# Supplementary material
Source: publisher figshare collection journal article supplement (https://acs.figshare.com/ndownloader/files/3876847)
Supplement: Supplementary file 1 [file 3876847]

## SUPPORTING INFORMATION

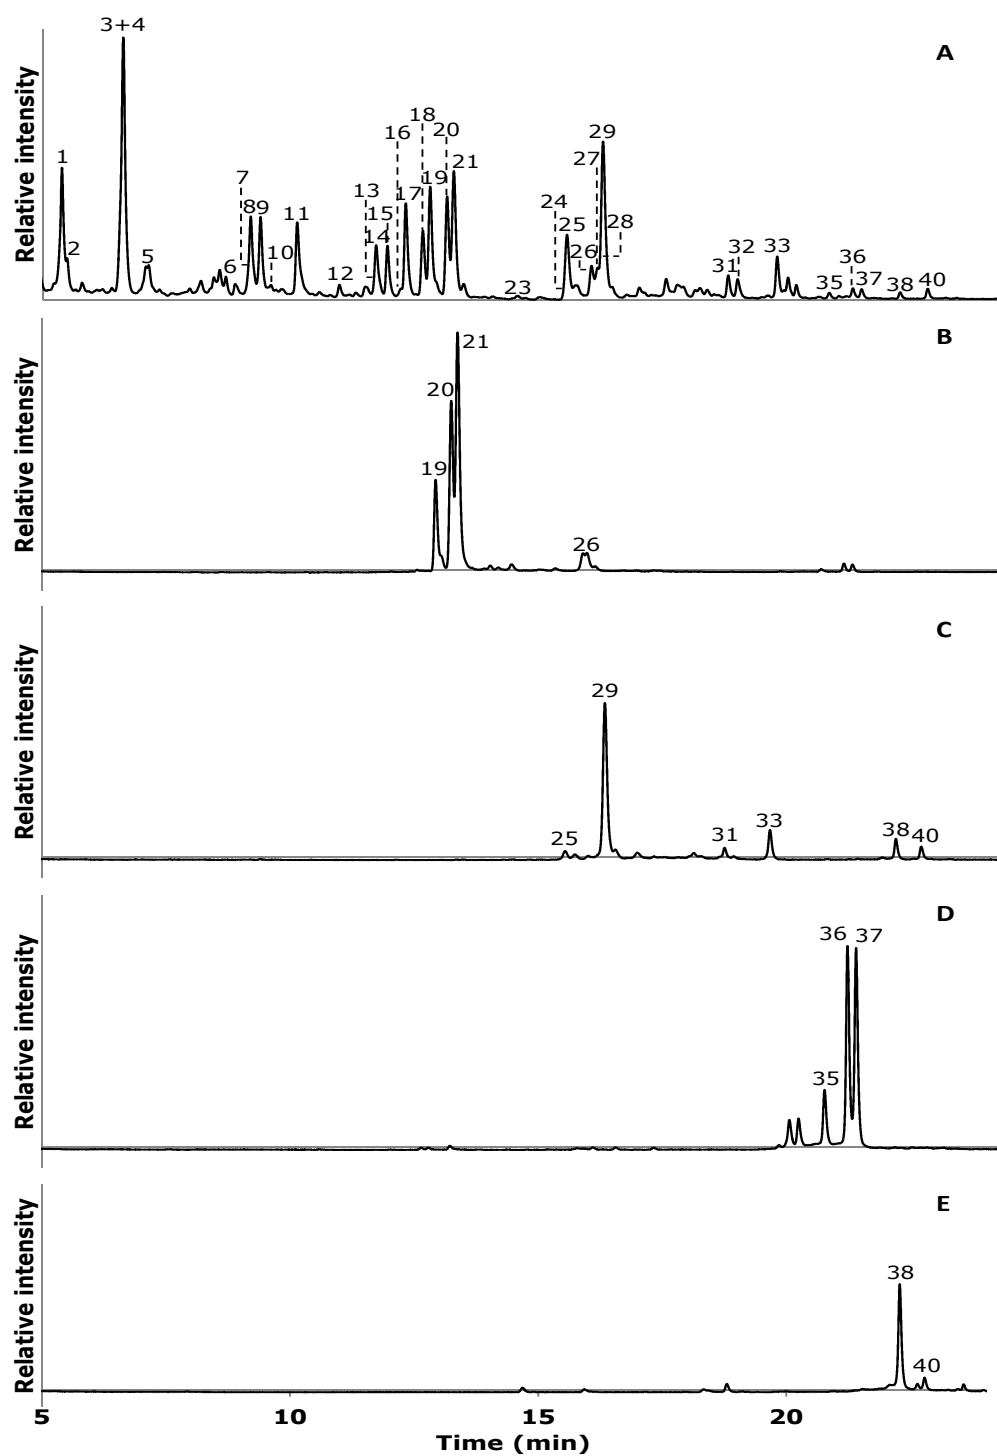

**Figure S1** RP-UHPLC-UV profile of the untreated soy extract (A), pool 1 (B), pool 2 (C), pool 3 (D), and pool 4 (E). Peak numbers refer to compounds in Table 1.
